# Supplementary material for: Glucosuria Predicts the Severity of Puumala Hantavirus Infection
Source: PubMed Central journal article supplement — Kidney Int Rep. 2019 May 31;4(9):1296–303. doi: 10.1016/j.ekir.2019.05.770 (PMC6734096; doi:10.1016/j.ekir.2019.05.770), 2019-05-31
Supplement: mmc1.pdf [file mmc1.pdf]

**Modified STROBE Statement—checklist of items that should be included in reports of observational studies (Cohort/Cross-sectional and case-control studies)**

|                      | <b>Item No</b> | <b>Recommendation</b>                                                                                                                                                                                                                                                                                                                                                                                                                                                                                                                                                           |
|----------------------|----------------|---------------------------------------------------------------------------------------------------------------------------------------------------------------------------------------------------------------------------------------------------------------------------------------------------------------------------------------------------------------------------------------------------------------------------------------------------------------------------------------------------------------------------------------------------------------------------------|
| Title and abstract   | 1              | <p>(a) Indicate the study's design with a commonly used term in the title or the abstract</p> <p>Yes (Glucosuria predicts the severity of Puumala hantavirus infection)</p> <hr/> <p>(b) Provide in the abstract an informative and balanced summary of what was done and what was found</p> <p>Yes</p>                                                                                                                                                                                                                                                                         |
| <b>Introduction</b>  |                |                                                                                                                                                                                                                                                                                                                                                                                                                                                                                                                                                                                 |
| Background/rationale | 2              | <p>Explain the scientific background and rationale for the investigation being reported</p> <p>Yes</p>                                                                                                                                                                                                                                                                                                                                                                                                                                                                          |
| Objectives           | 3              | <p>State specific objectives, including any prespecified hypotheses</p> <p>Yes, does glucosuria at hospital admission predict severity of acute kidney injury in patients with Puumala hantavirus infection.</p>                                                                                                                                                                                                                                                                                                                                                                |
| <b>Methods</b>       |                |                                                                                                                                                                                                                                                                                                                                                                                                                                                                                                                                                                                 |
| Study design         | 4              | <p>Present key elements of study design early in the paper</p> <p>Yes, presented in abstract. More detailed description in Materials and methods, and Results.</p>                                                                                                                                                                                                                                                                                                                                                                                                              |
| Setting              | 5              | <p>Describe the setting, locations, and relevant dates, including periods of recruitment, exposure, follow-up, and data collection</p> <p>Yes, described in Materials and methods (pages 4-6)</p>                                                                                                                                                                                                                                                                                                                                                                               |
| Participants         | 6              | <p>(a) <i>Cohort study</i>—Give the eligibility criteria, and the sources and methods of selection of participants. Describe methods of follow-up</p> <p>Yes, all the patients who were treated in the Tampere University hospital for Puumala hantavirus infection during the indicated period of time and who provided an informed consent. Patients lacking a dipstick urine test at hospital admission were excluded from further analysis. Clinical features and laboratory samples were measured during the hospital care. See Materials and methods p. 4-6, sections</p> |

Subjects (page 4) and Laboratory determinations (page 5-6), and Results (p. 7-9).

*Case-control study*—Give the eligibility criteria, and the sources and methods of case ascertainment and control selection. Give the rationale for the choice of cases and controls

*Cross-sectional study*—Give the eligibility criteria, and the sources and methods of selection of participants

|                              |    |                                                                                                                                                                                                                                                                                                                                                                                                                                                                                                                                           |
|------------------------------|----|-------------------------------------------------------------------------------------------------------------------------------------------------------------------------------------------------------------------------------------------------------------------------------------------------------------------------------------------------------------------------------------------------------------------------------------------------------------------------------------------------------------------------------------------|
| Variables                    | 7  | Clearly define all outcomes, exposures, predictors, potential confounders, and effect modifiers. Give diagnostic criteria, if applicable<br><br>Yes, see Results (p. 7-9) and Discussion (p. 10-14).                                                                                                                                                                                                                                                                                                                                      |
| Data sources/<br>measurement | 8* | For each variable of interest, give sources of data and details of methods of assessment (measurement).<br><br>Yes, see Materials and methods (p. 4-5, section Subjects and p. 5-6, section Laboratory determinations).                                                                                                                                                                                                                                                                                                                   |
| Bias                         | 9  | Describe any efforts to address potential sources of bias<br><br>Patients with less severe Puumala hantavirus infection do not need hospital care and therefore are not included in the study.                                                                                                                                                                                                                                                                                                                                            |
| Study size                   | 10 | Explain how the study size was arrived at (if applicable)<br><br>Patients treated for Puumala hantavirus infection during the indicated period of time. See Materials and methods (page 4, paragraph 1).                                                                                                                                                                                                                                                                                                                                  |
| Quantitative<br>variables    | 11 | Explain how quantitative variables were handled in the analyses. If applicable, describe which groupings were chosen and why<br><br>Patients were grouped according to the presence or absence of glucosuria in the dipstick urine test at hospital admission. Blood and urine samples were collected during the hospital care and analyzed in certified laboratory. In addition, clinical features were followed during the hospital care. See Materials and methods (p. 4 section Subjects and p. 5 section Laboratory determinations). |
| Statistical methods          | 12 | (a) Describe all statistical methods, including those used to control for confounding<br><br>Yes, see materials and methods (p. 6 section Statistical analyses).<br><hr/> <i>(b) Describe any methods used to examine subgroups and interactions</i> <hr/> <i>(c) Explain how missing data were addressed</i>                                                                                                                                                                                                                             |

Patients lacking a dipstick urine test at hospital admission were excluded from further analysis, see Materials and methods (p. 4, paragraph 3).

---

*(d) Cohort study*—If applicable, explain how loss to follow-up was addressed

Patients who provided an informed consent, were followed during the hospital care. There was no follow-up after hospital care and therefore no patients were missed.

*Case-control study*—If applicable, explain how matching of cases and controls was addressed

*Cross-sectional study*—If applicable, describe analytical methods taking account of sampling strategy

---

*(e) Describe any sensitivity analyses -*

---

## Results

### Participants

13\*

*(a) Report numbers of individuals at each stage of study—eg numbers potentially eligible, examined for eligibility, confirmed eligible, included in the study, completing follow-up, and analyzed*

Yes, patient selection described in Materials and methods (p. 4, section Subjects). Patients lacking a dipstick urine test at hospital admission were excluded from further analysis.

---

*(c) Use of a flow diagram*

Not applicable

---

### Descriptive data

14\*

*(a) Give characteristics of study participants (eg demographic, clinical, social) and information on exposures and potential confounders*

Yes, see Materials and methods; page 4, Results; page 7 and Table 1.

---

*(b) Indicate number of participants with missing data for each variable of interest*

Number of patients with urine sample taken at various stages of the study is indicated in Materials and methods, section Subjects; page 4, paragraph 3 and in Laboratory determinations; page 5, paragraph 3.

Number of patients with chest radiography taken is indicated in Materials and methods; page 4, paragraph 4.

Number of patients with blood samples taken and analyzed is indicated in Materials and methods, section Laboratory determinations, page 6, paragraph 2.

Number of patients with blood glucose samples taken and analyzed is indicated in Results, page 8, paragraph 3.

---

(c) *Cohort study*—Summarise follow-up time (eg, average and total amount)

Yes, time spent in the hospital (see Table 1; hospital stay).

|                   |     |                                                                                                                                                                                                              |
|-------------------|-----|--------------------------------------------------------------------------------------------------------------------------------------------------------------------------------------------------------------|
| Outcome data      | 15* | <i>Cohort study</i> —Report numbers of outcome events or summary measures over time                                                                                                                          |
|                   |     | Not applicable.                                                                                                                                                                                              |
|                   |     | <i>Case-control study</i> —Report numbers in each exposure category, or summary measures of exposure                                                                                                         |
|                   |     | <i>Cross-sectional study</i> —Report numbers of outcome events or summary measures                                                                                                                           |
| Main results      | 16  | (a) Give unadjusted estimates and, if applicable, confounder-adjusted estimates and their precision (eg, 95% confidence interval). Make clear which confounders were adjusted for and why they were included |
|                   |     | Not applicable.                                                                                                                                                                                              |
| Other analyses    | 17  | Report other analyses done—eg analyses of subgroups and interactions, and sensitivity analyses                                                                                                               |
|                   |     | Not applicable                                                                                                                                                                                               |
| <b>Discussion</b> |     |                                                                                                                                                                                                              |
| Key results       | 18  | Summarise key results with reference to study objectives                                                                                                                                                     |
|                   |     | Yes, see Discussion (p. 10, paragraph 3 and page 14, paragraph 2-4).                                                                                                                                         |
| Limitations       | 19  | Discuss limitations of the study, taking into account sources of potential bias or imprecision. Discuss both direction and magnitude of any potential bias                                                   |
|                   |     | Patients with less severe Puumala hantavirus infection do not need hospital care and therefore are not included in the study.                                                                                |
|                   |     | Glucosuria is an early and transient sign in the course of Puumala virus infection. Patients may have been glucosuric before hospital admission.                                                             |

|                  |    |                                                                                                                                                                                                                                |
|------------------|----|--------------------------------------------------------------------------------------------------------------------------------------------------------------------------------------------------------------------------------|
| Interpretation   | 20 | Give a cautious overall interpretation of results considering objectives, limitations, multiplicity of analyses, results from similar studies, and other relevant evidence<br><br>Yes, see discussion (p. 14, paragraphs 2-3). |
| Generalisability | 21 | Discuss the generalisability (external validity) of the study results<br><br>Yes, see discussion (p. 14, paragraphs 2-4)                                                                                                       |

\*Give information separately for cases and controls in case-control studies and, if applicable, for exposed and unexposed groups in cohort and cross-sectional studies.

**Note:** An Explanation and Elaboration article discusses each checklist item and gives methodological background and published examples of transparent reporting. The STROBE checklist is best used in conjunction with this article (freely available on the Web sites of PLoS Medicine at <http://www.plosmedicine.org/>, Annals of Internal Medicine at <http://www.annals.org/>, and Epidemiology at <http://www.epidem.com/>). Information on the STROBE Initiative is available at [www.strobe-statement.org](http://www.strobe-statement.org).
